# Supplementary material for: Gli1 Mediates Lung Cancer Cell Proliferation and Sonic Hedgehog-Dependent Mesenchymal Cell Activation
Source: PubMed Central journal article supplement (PMC3646741; doi:10.1371/journal.pone.0063226), 2013-05-07

## Supplementary Figure 7

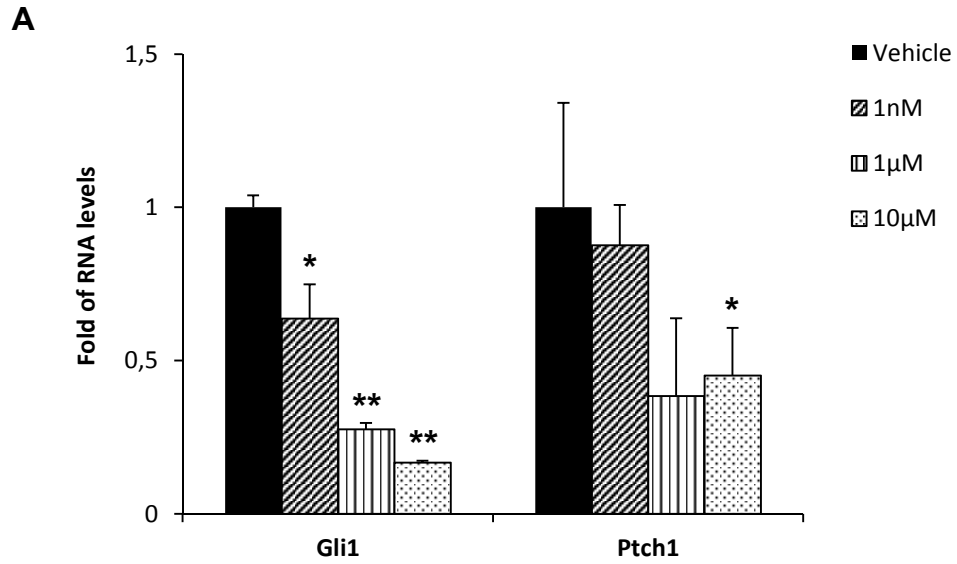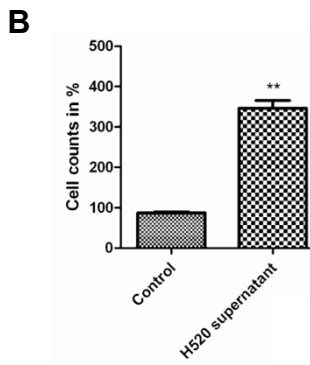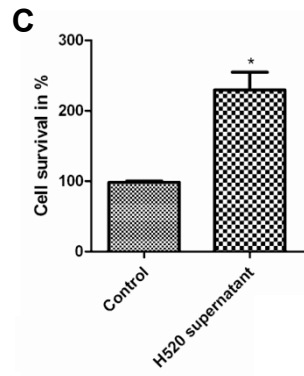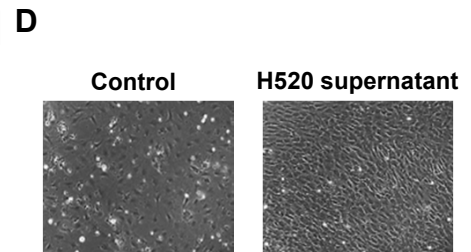

Supplement: pone.0063226.s007.pdf [file pone.0063226.s007.pdf]
